# Supplementary material for: An enhanced Eco1 retron editor enables precision genome engineering in human cells without double-strand breaks
Source: PubMed Central journal article supplement — bioRxiv. 2025 May 12:2024.08.05.606586. Preprint. [Version 3] doi: 10.1101/2024.08.05.606586 (PMC11326160; doi:10.1101/2024.08.05.606586), 2025-05-12
Supplement: NIHPP2024.08.05.606586v2-supplement-1.pdf [file NIHPP2024.08.05.606586v2-supplement-1.pdf]

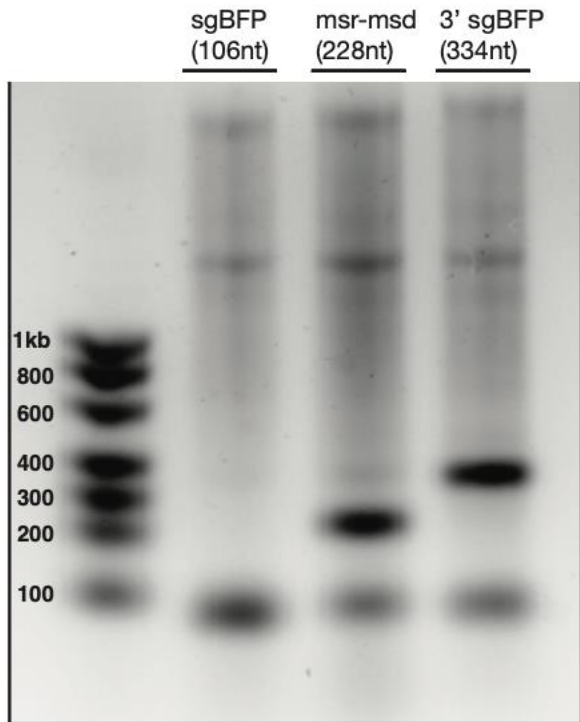

**Supplemental Figure 1. Confirmation of IVT RNA products by agarose gel electrophoresis.** Electrophoretic size separation in agarose gel of sgBFP, msr-msd with internal GFP template, and msr-msd-sgBFP ncRNAs. Each lane was loaded with 200ng of IVT RNA product.

## Huh-7.5 cells ec86 Retron qPCR\_compiled

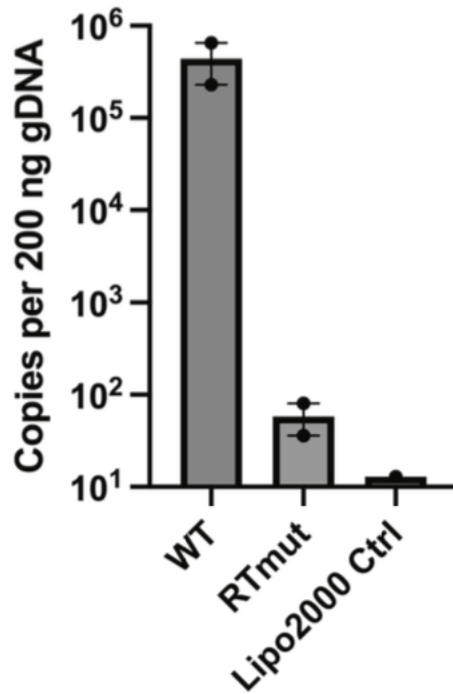

**Supplemental Figure 2. Validation of catalytically inactive Eco1 RTmut by qPCR quantification of retron RT-DNA.** Electrophoretic size separation in agarose gel of sgBFP, msr-msd with internal GFP template, and msr-msd-sgBFP ncRNAs. Each lane was loaded with 200ng of IVT RNA product.

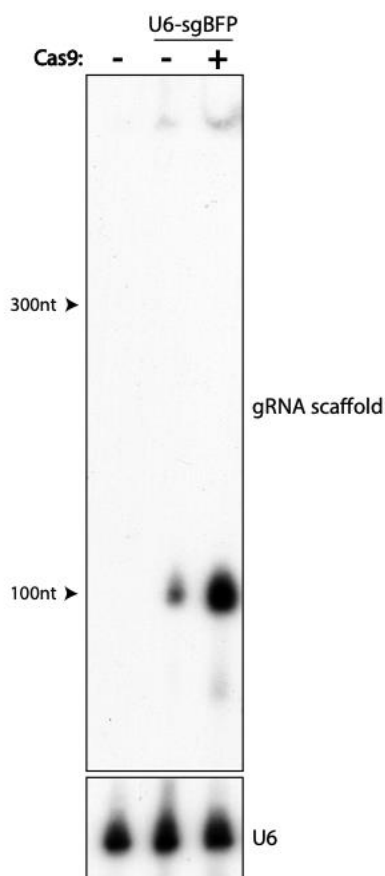

**Supplemental Figure 3. sgRNA stability in the presence and absence of Cas9.** Northern blot analysis of sgRNA from whole-cell lysates of HEK293T cells transfected with plasmids expressing sgBFP and either Cas9 or pUC19. <sup>32</sup>P radiolabeled ssDNA probes were designed to target the scaffold sequence of the sgRNA. Probe sequence is listed in Supplemental Table 1.
